# Supplementary material for: Yields and Nitrogen Dynamics in Ley-Arable Systems—Comparing Different Approaches in the APSIM Model
Source: MDPI journal article supplement (doi:10.3390/agronomy12030738), 2022-03-18
Supplement: s1 [file s1]

## Supplementary Materials

**Table S1** Maize fertilizer application at E1 (Vredepeel, the Netherlands) during the analysed period (2013 -2019)

|                                                  | 2013 | 2014 | 2015 | 2016 | 2017 | 2018 | 2019 |
|--------------------------------------------------|------|------|------|------|------|------|------|
| <b>Organic fertilizer (kg N ha<sup>-1</sup>)</b> | 202  | 164  | 161  | 161  | 96   | 125  | 146  |
| <b>Mineral fertilizer (kg N ha<sup>-1</sup>)</b> | 55   | 27   | 27   | 27   | 27   | 21   | 27   |

**Table S2** Crops and fertilizer application rates at E3 'Schuby, Denmark' analysed period (2012 -2020), SM =forage maize, WR = winter rye and RG = ryegrass

|                                                  | 2012              | 2013     | 2013           | 2014          | 2015 <sup>2</sup> | 2016           | 2017             | 2018            | 2019               |
|--------------------------------------------------|-------------------|----------|----------------|---------------|-------------------|----------------|------------------|-----------------|--------------------|
| <b>Crop type</b>                                 | SM                | WR       | RG             | SM            | SM                | WR             | SM               | SM              | SM                 |
| <b>Cultivar and maturity class<sup>1</sup></b>   | Fernandez<br>S250 |          |                | P7524<br>S200 |                   |                | Kartagas<br>S230 | Kartags<br>S230 | Amaveritas<br>S240 |
| <b>Organic fertilizer (kg N ha<sup>-1</sup>)</b> | 117               | 82       | 47<br>47<br>53 | 82            | 77                | 79             | 137              | 88              | 182                |
| <b>Mineral fertilizer (kg N ha<sup>-1</sup>)</b> | 27<br>46          | 32<br>46 | 81             | 27<br>38      | 29<br>54          | 69<br>27<br>34 | 21<br>35         | 18<br>28        | 14<br>32           |

<sup>1</sup> Early maturity cultivar (S170-220), mid-early cultivar (S230-250), mid-late cultivar (S60-290), late cultivar (300-350)

<sup>2</sup> Cultivar sown was not available

**Table S3.** Soil physical characteristics used for E1 (Vredepeel, the Netherlands). BD = bulk density, AirDry = water content of air dry soil, LL15 = lower limit or permanent wilting point at -15 bar, DUL = drained upper limit or field capacity, SAT = saturated limit. The soil C:N ratio was set to 15

| Depth<br>Cm | BD<br>(g/cc) | AirDry<br>(mm/mm) | LL15<br>(mm/mm) | DUL<br>(mm/mm) | SAT<br>(mm/mm) |
|-------------|--------------|-------------------|-----------------|----------------|----------------|
| 0-10        | 1.44         | 0.024             | 0.047           | 0.251          | 0.401          |
| 10-25       | 1.50         | 0.038             | 0.047           | 0.251          | 0.384          |
| 25-50       | 1.50         | 0.047             | 0.047           | 0.251          | 0.384          |
| 50-100      | 1.50         | 0.047             | 0.047           | 0.251          | 0.384          |
| 100-150     | 1.50         | 0.047             | 0.047           | 0.251          | 0.384          |

**Table S4.** Soil physical characteristics used for modelling E2 (Jyndevad, Denmark) and E3 (Schuby, Germany). BD = bulk density, AirDry = water content of air dry soil, LL15 = lower limit or permanent wilting point at -15 bar, DUL = drained upper limit or field capacity, SAT = saturated limit. The soil C:N ratio was set to 11 for E2 and to 15 for E3

| Depth   | BD     | AirDry  | LL15    | DUL     | SAT     |
|---------|--------|---------|---------|---------|---------|
| (cm)    | (g/cc) | (mm/mm) | (mm/mm) | (mm/mm) | (mm/mm) |
| 0-28    | 1.35   | 0.023   | 0.046   | 0.149   | 0.429   |
| 28-35   | 1.41   | 0.037   | 0.046   | 0.149   | 0.429   |
| 35-43   | 1.41   | 0.046   | 0.046   | 0.149   | 0.429   |
| 43-52   | 1.55   | 0.046   | 0.046   | 0.149   | 0.429   |
| 52-68   | 1.76   | 0.046   | 0.046   | 0.149   | 0.429   |
| 68-75   | 1.80   | 0.046   | 0.046   | 0.149   | 0.429   |
| 75-80   | 1.80   | 0.046   | 0.046   | 0.149   | 0.429   |
| 80-100  | 1.79   | 0.046   | 0.046   | 0.149   | 0.429   |
| 100-150 | 1.79   | 0.046   | 0.046   | 0.149   | 0.429   |

**Table S5.** Soil NH<sub>4</sub> and NO<sub>3</sub> values used to initialize APSIM for E1 (Vredepeel, the Netherlands)

|         | 2013  |       | 2014  |       | 2015  |       | 2016  |       | 2017  |       | 2018  |       | 2019  |       |
|---------|-------|-------|-------|-------|-------|-------|-------|-------|-------|-------|-------|-------|-------|-------|
| Depth   | NO3   | NH4   |
| (cm)    | (ppm) |
| 0-10    | 3.188 | 0.354 | 7.500 | 0.883 | 3.438 | 0.382 | 2.500 | 0.278 | 3.938 | 0.438 | 0.531 | 0.059 | 1.875 | 0.208 |
| 10-25   | 2.040 | 0.227 | 4.800 | 0.533 | 2.200 | 0.244 | 1.600 | 0.178 | 2.520 | 0.280 | 0.340 | 0.038 | 1.200 | 0.133 |
| 25-50   | 1.224 | 0.136 | 2.880 | 0.320 | 1.320 | 0.147 | 0.960 | 0.107 | 1.512 | 0.168 | 0.204 | 0.023 | 0.720 | 0.080 |
| 50-100  | 0.061 | 0.007 | 0.144 | 0.016 | 0.066 | 0.007 | 0.048 | 0.005 | 0.076 | 0.008 | 0.010 | 0.001 | 0.036 | 0.004 |
| 100-150 | 0.061 | 0.007 | 0.144 | 0.016 | 0.066 | 0.007 | 0.048 | 0.005 | 0.076 | 0.008 | 0.010 | 0.001 | 0.036 | 0.004 |

**Table S6** Observed and estimated emergence and flowering dates (n<sup>th</sup> day of the year) in E1 (Vredepeel, the Netherlands).

| Year | Emergence | Emergence APSIM | Flowering | Flowering date APSIM |
|------|-----------|-----------------|-----------|----------------------|
| 2013 | 147       | 143             | 219       | 223                  |
| 2014 | 119       | 120             | 212       | 209                  |
| 2015 | 128       | 128             | 196       | 216                  |
| 2016 | 132       | 132             | 217       | 214                  |
| 2017 | 138       | 137             |           |                      |
| 2018 | 131       | 133             | 201       | 206                  |
| 2019 | 136       | 134             |           |                      |

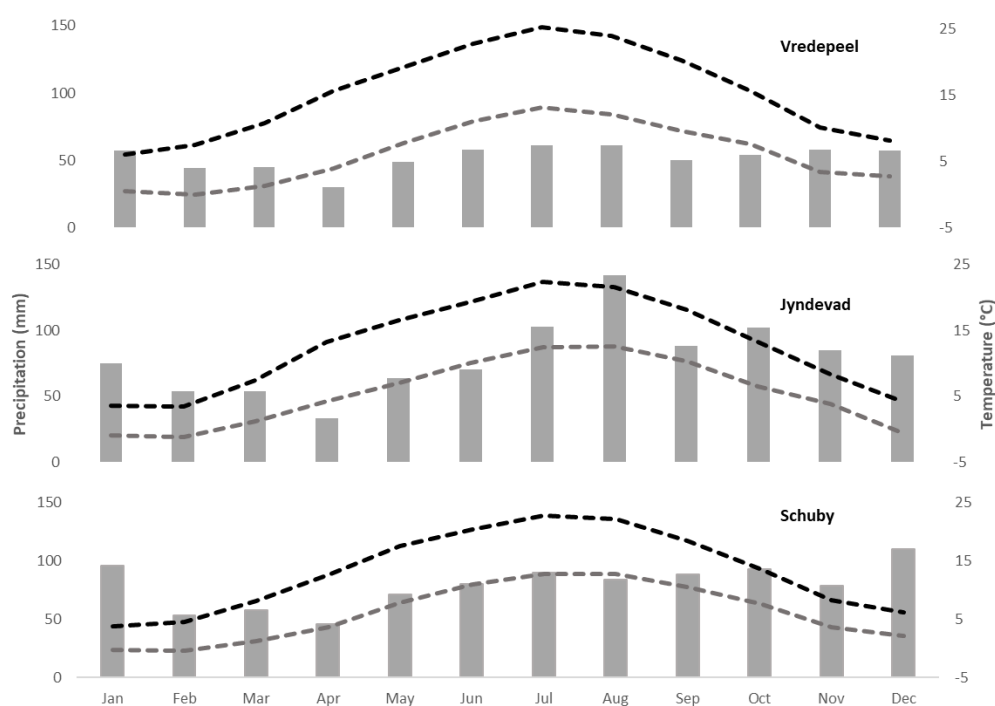

**Figure S1.** Average climate conditions of E1 (Vredepeel, the Netherlands) for the period 2013-2019, E2 (Jynde vad, Denmark) for the period 2006 -2012 and E3 (Schuby, Germany) for the period 2012 -2019 used for modelling in APSIM. Precipitation is average monthly sum (bars), maximum (dashed black line) and minimum (dashed grey line) temperature is monthly average of the daily value.
